# Supplementary material for: Mild and Efficient One-Step Synthesis of Nitrogen-Doped Multistage Porous Carbon for High-Performance Supercapacitors
Source: MDPI journal article supplement (doi:10.3390/molecules28248136), 2023-12-17

## **Supplementary materials**

# **Mild and efficient One-step synthesis of nitrogen-doped multistage porous carbon for high-performance supercapacitors**

Tianliang Zhang <sup>1</sup> and Jun Li <sup>1, \*</sup>

<sup>1</sup> College of Chemical Engineering, Sichuan University, Chengdu 610065, China

\* Correspondence: [lijun@scu.edu.cn](mailto:lijun@scu.edu.cn)

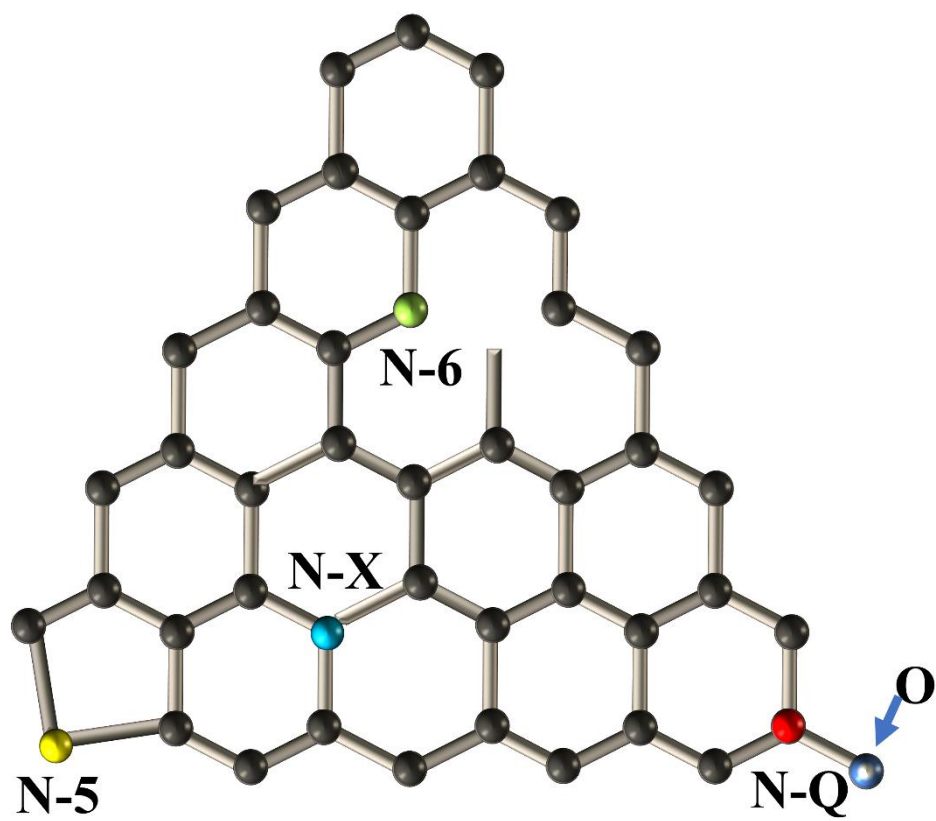

**Figure S1.** The mode of existence of nitrogen atoms in the carbon skeleton

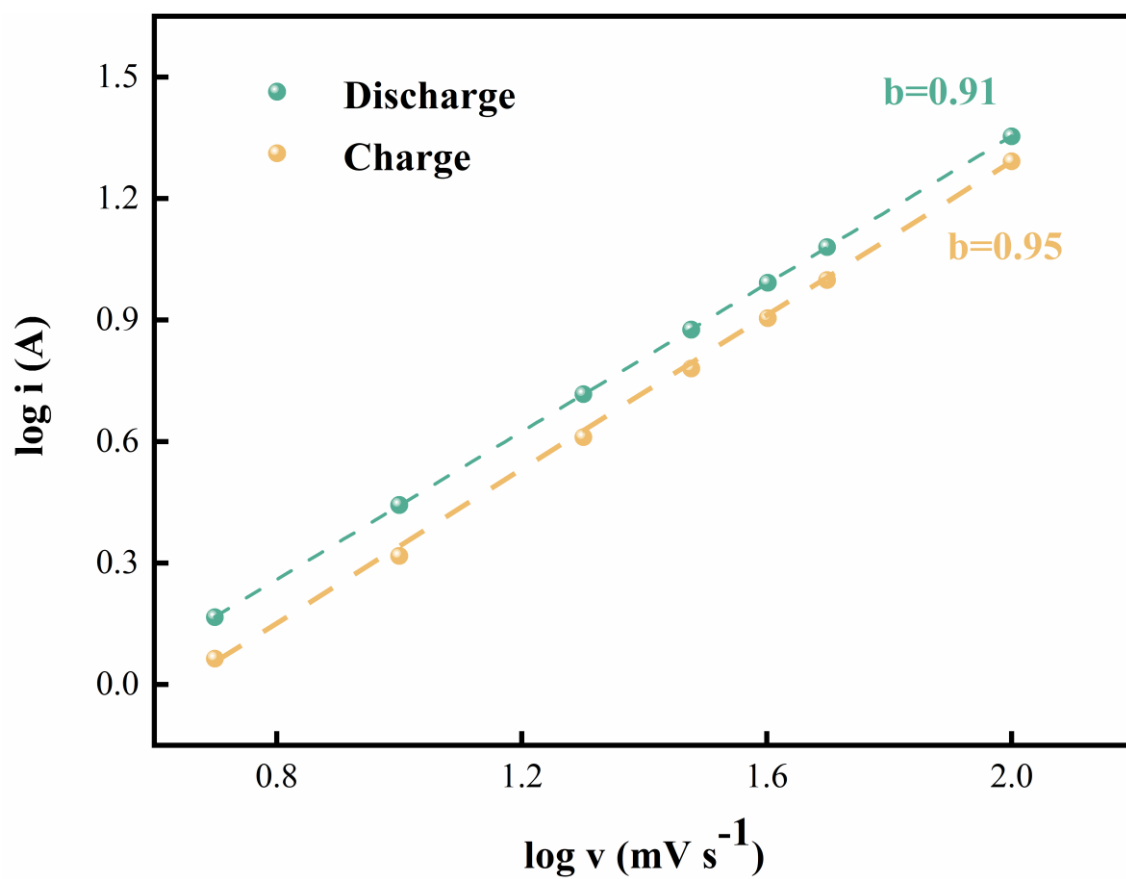

**Figure S2.** Fitted plots of peak current versus scan rate for the charging process (orange curve) and the discharging process (green curve) for N-PAC<sub>0.5</sub>, fitted slopes are the values of  $b$ .

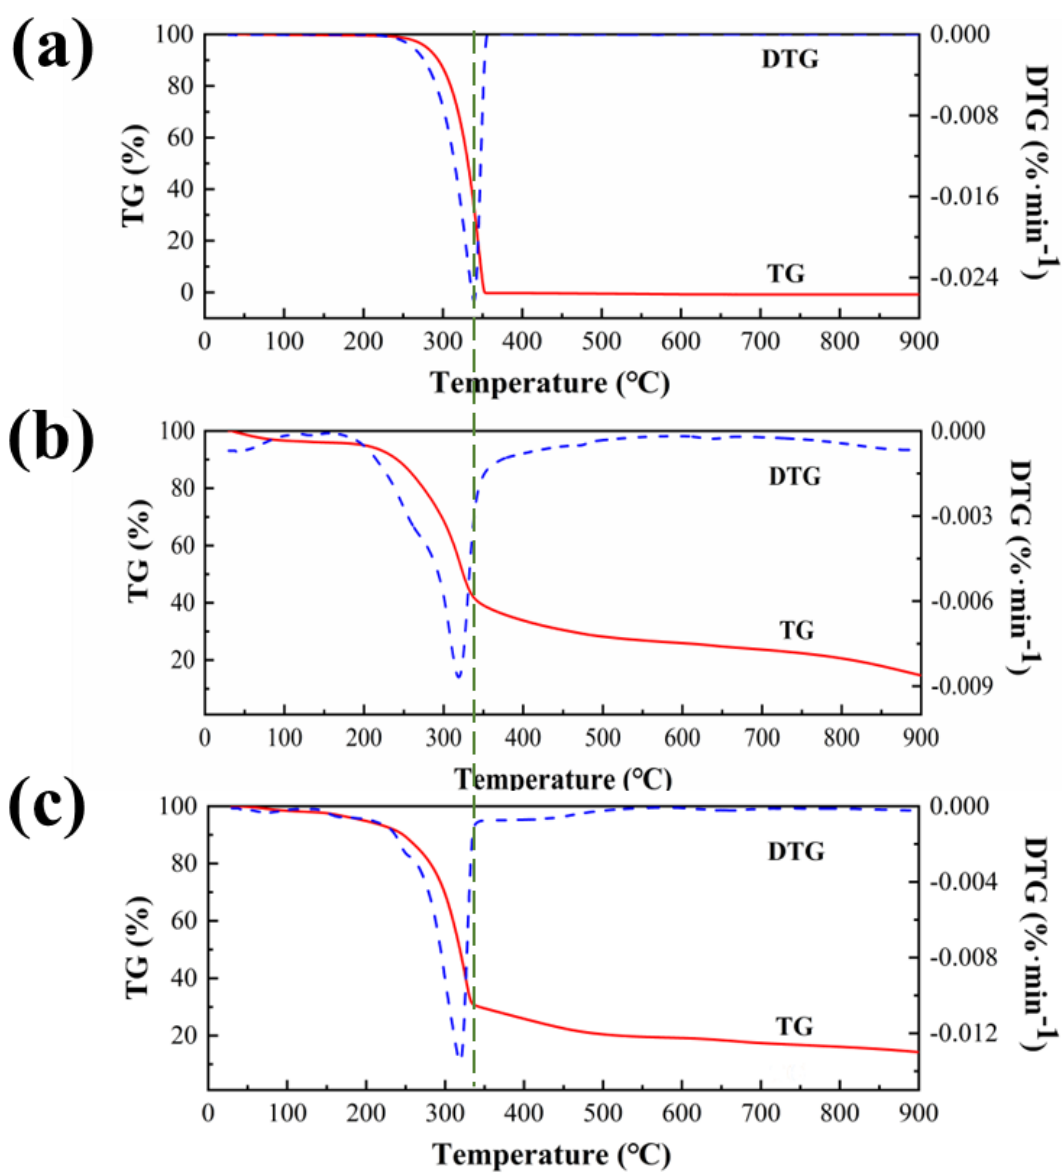

**Figure S3.** TG and DTG curves: (a) melamine; (b) tobacco straw;(c) melamine: tobacco straw =1:1

### Detailed information on K<sub>2</sub>CO<sub>3</sub> activation

During the activation process, K<sub>2</sub>CO<sub>3</sub> decomposes into CO<sub>2</sub> and K<sub>2</sub>O, which reacts with C atoms and then generates K and CO. When the temperature exceeds the boiling point of K (about 800 °C), the K vapor drills into the carbon layer and causes damage to the structure of the carbon material. In addition, the CO<sub>2</sub> produced during the activation process also plays a physical porosity role on the carbon structure [40].

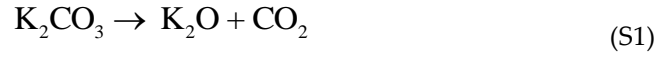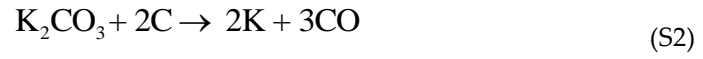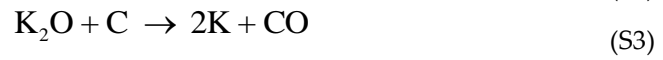

Supplement: s1 [file s1]
